# Supplementary material for: Heavy atom tunnelling on XeF6 pseudorotation
Source: Royal Society of Chemistry journal article supplement (doi:10.1039/d0cp03205k), 2020-01-01
Supplement: d0cp03205k1.pdf [file d0cp03205k1.pdf]

## Heavy-Atom Tunnelling on XeF<sub>6</sub> Pseudorotation

### Supporting Information

Itzhak Sedgi,<sup>†,‡</sup> and Sebastian Kozuch,<sup>\*,†</sup>

<sup>†</sup> Department of Chemistry, Ben-Gurion University of the Negev, Beer-Sheva 841051, Israel.

<sup>‡</sup> Department of Analytical Chemistry, Nuclear Research Center Negev. P.O Box 9001, Beer-Sheva, Israel.

#### Table of Contents

|                                            |     |
|--------------------------------------------|-----|
| Energy Benchmark                           | S2  |
| Rate Constants                             | S3  |
| KIE                                        | S9  |
| Example of Polyrate input file             | S10 |
| XYZ optimized geometries                   | S11 |
| <sup>18</sup> F monosubstituted IR spectra | S12 |
| References                                 | S13 |

## Energy Benchmark

As mentioned in the main text, the energy barrier of XeF<sub>6</sub> (C<sub>3v</sub>) pseudorotation, was benchmarked against the results of Peterson<sup>1</sup> et al. (which were energetically confirmed later by Stanton et al.<sup>2</sup>). In order to find the most compatible functional and basis set combination that will offer the highest accuracy at a reasonable cost, we examined various functionals with the Karlsruhe family basis sets up to the triple-zeta level. Table S1 summarizes those results and confirms the compatibility of BMK/def2tzvp to the energy benchmark. To achieve maximum accuracy, the energy profile was further matched to the exact benchmark energies using the interpolated single point energy (ISPE)<sup>3</sup> method.

**Table S1.**  $\Delta E^\ddagger$  (kJ·mol<sup>-1</sup>) for XeF<sub>6</sub> (C<sub>3v</sub>) pseudorotation. Null values indicate failure to obtain the C<sub>3v</sub> geometry as the ground state.

| Functional    | Basis-Set | $\Delta E^\ddagger$ |
|---------------|-----------|---------------------|
| TPSSh         | Def2-SV   | -                   |
|               | Def2-TZVP | -                   |
| MN15          | Def2-SV   | 2.80                |
|               | Def2-TZVP | 3.18                |
| MN15L         | Def2-SV   | -                   |
|               | Def2-TZVP | 3.18                |
| M062X         | Def2-SV   | 5.40                |
|               | Def2-TZVP | 6.07                |
| $\omega$ B97X | Def2-SV   | 2.13                |
|               | Def2-TZVP | 2.97                |
| PBE0          | Def2-SV   | -                   |
|               | Def2-TZVP | 2.05                |
| PBE           | Def2-SV   | -                   |
|               | Def2-TZVP | -                   |
| B97D3         | Def2-SV   | -                   |
|               | Def2-TZVP | -                   |
| TPSSTPSS      | Def2-SV   | -                   |
|               | Def2-TZVP | -                   |
| BMK           | Def2-SV   | 3.47                |
|               | Def2-TZVP | 4.44                |
| Ref.          |           | 4.52                |

**Table S2.** CVT and CVT+SCT rate constants (in s<sup>-1</sup>) not including symmetry numbers correction.

| XeF <sub>6</sub> |          |          | XeF <sub>6</sub> [ <sup>18</sup> F <sub>α+β+γ</sub> ] |          |          |
|------------------|----------|----------|-------------------------------------------------------|----------|----------|
| T(K)             | CVT      | CVT+SCT  | T(K)                                                  | CVT      | CVT+SCT  |
| 4                | 1.80E-33 | 4.74E+02 | 4                                                     | 4.48E-33 | 9.81E+02 |
| 5                | 1.22E-24 | 4.74E+02 | 5                                                     | 2.53E-24 | 9.81E+02 |
| 6                | 9.74E-19 | 4.74E+02 | 6                                                     | 1.79E-18 | 9.81E+02 |
| 7                | 1.64E-14 | 4.74E+02 | 7                                                     | 2.75E-14 | 9.82E+02 |
| 8                | 2.46E-11 | 4.75E+02 | 8                                                     | 3.88E-11 | 9.83E+02 |
| 9                | 7.39E-09 | 4.78E+02 | 9                                                     | 1.11E-08 | 9.89E+02 |
| 10               | 7.16E-07 | 4.89E+02 | 10                                                    | 1.03E-06 | 1.01E+03 |
| 12               | 7.00E-04 | 5.63E+02 | 12                                                    | 9.48E-04 | 1.12E+03 |
| 14               | 9.80E-02 | 8.24E+02 | 14                                                    | 1.27E-01 | 1.55E+03 |
| 16               | 4.05E+00 | 1.66E+03 | 16                                                    | 5.09E+00 | 2.85E+03 |
| 18               | 7.42E+01 | 4.36E+03 | 18                                                    | 9.09E+01 | 6.93E+03 |
| 20               | 7.67E+02 | 1.31E+04 | 20                                                    | 9.21E+02 | 1.98E+04 |
| 22               | 5.21E+03 | 4.54E+04 | 22                                                    | 6.16E+03 | 6.18E+04 |
| 24               | 2.59E+04 | 1.40E+05 | 24                                                    | 3.02E+04 | 1.82E+05 |
| 26               | 1.01E+05 | 3.94E+05 | 26                                                    | 1.16E+05 | 4.95E+05 |
| 28               | 3.24E+05 | 1.00E+06 | 28                                                    | 3.70E+05 | 1.23E+06 |
| 30               | 8.93E+05 | 2.32E+06 | 30                                                    | 1.01E+06 | 2.78E+06 |
| 40               | 3.16E+07 | 5.17E+07 | 40                                                    | 3.49E+07 | 5.86E+07 |
| 50               | 2.73E+08 | 3.70E+08 | 50                                                    | 2.96E+08 | 4.08E+08 |
| 75               | 5.00E+09 | 5.70E+09 | 75                                                    | 5.31E+09 | 6.10E+09 |
| 77.36            | 5.98E+09 | 6.77E+09 | 77.36                                                 | 6.35E+09 | 7.22E+09 |
| 100              | 2.21E+10 | 2.38E+10 | 100                                                   | 2.32E+10 | 2.51E+10 |
| 125              | 5.52E+10 | 5.78E+10 | 125                                                   | 5.75E+10 | 6.04E+10 |
| 150              | 1.03E+11 | 1.06E+11 | 150                                                   | 1.06E+11 | 1.10E+11 |
| 175              | 1.61E+11 | 1.65E+11 | 175                                                   | 1.67E+11 | 1.71E+11 |
| 194.7            | 2.12E+11 | 2.16E+11 | 194.7                                                 | 2.19E+11 | 2.24E+11 |
| 200              | 2.26E+11 | 2.31E+11 | 200                                                   | 2.34E+11 | 2.38E+11 |
| 225              | 2.96E+11 | 3.01E+11 | 225                                                   | 3.06E+11 | 3.10E+11 |
| 250              | 3.68E+11 | 3.73E+11 | 250                                                   | 3.79E+11 | 3.84E+11 |
| 273.15           | 4.35E+11 | 4.40E+11 | 273.15                                                | 4.48E+11 | 4.53E+11 |
| 275              | 4.41E+11 | 4.45E+11 | 275                                                   | 4.54E+11 | 4.58E+11 |
| 298.15           | 5.07E+11 | 5.11E+11 | 298.15                                                | 5.21E+11 | 5.26E+11 |
| 300              | 5.12E+11 | 5.16E+11 | 300                                                   | 5.27E+11 | 5.31E+11 |
| 325              | 5.82E+11 | 5.86E+11 | 325                                                   | 5.98E+11 | 6.03E+11 |
| 350              | 6.50E+11 | 6.54E+11 | 350                                                   | 6.68E+11 | 6.72E+11 |
| 373.15           | 7.11E+11 | 7.15E+11 | 373.15                                                | 7.30E+11 | 7.34E+11 |
| 375              | 7.16E+11 | 7.19E+11 | 375                                                   | 7.35E+11 | 7.39E+11 |
| 400              | 7.79E+11 | 7.82E+11 | 400                                                   | 8.00E+11 | 8.03E+11 |

XeF<sub>6</sub> [<sup>18</sup>F<sub>α</sub>]

| T(K)   | CVT      | CVT+SCT  |
|--------|----------|----------|
| 4      | 3.20E-33 | 8.59E+02 |
| 5      | 1.93E-24 | 8.59E+02 |
| 6      | 1.43E-18 | 8.59E+02 |
| 7      | 2.27E-14 | 8.59E+02 |
| 8      | 3.28E-11 | 8.60E+02 |
| 9      | 9.52E-09 | 8.65E+02 |
| 10     | 9.00E-07 | 8.80E+02 |
| 12     | 8.47E-04 | 9.84E+02 |
| 14     | 1.15E-01 | 1.35E+03 |
| 16     | 4.68E+00 | 2.50E+03 |
| 18     | 8.43E+01 | 6.12E+03 |
| 20     | 8.60E+02 | 1.80E+04 |
| 22     | 5.79E+03 | 5.66E+04 |
| 24     | 2.85E+04 | 1.69E+05 |
| 26     | 1.10E+05 | 4.62E+05 |
| 28     | 3.52E+05 | 1.15E+06 |
| 30     | 9.66E+05 | 2.63E+06 |
| 40     | 3.36E+07 | 5.62E+07 |
| 50     | 2.87E+08 | 3.94E+08 |
| 75     | 5.19E+09 | 5.95E+09 |
| 77.36  | 6.21E+09 | 7.06E+09 |
| 100    | 2.28E+10 | 2.46E+10 |
| 125    | 5.67E+10 | 5.95E+10 |
| 150    | 1.05E+11 | 1.09E+11 |
| 175    | 1.65E+11 | 1.69E+11 |
| 194.7  | 2.17E+11 | 2.21E+11 |
| 200    | 2.32E+11 | 2.36E+11 |
| 225    | 3.03E+11 | 3.07E+11 |
| 250    | 3.76E+11 | 3.81E+11 |
| 273.15 | 4.44E+11 | 4.49E+11 |
| 275    | 4.50E+11 | 4.54E+11 |
| 298.15 | 5.17E+11 | 5.22E+11 |
| 300    | 5.23E+11 | 5.27E+11 |
| 325    | 5.94E+11 | 5.98E+11 |
| 350    | 6.63E+11 | 6.67E+11 |
| 373.15 | 7.25E+11 | 7.29E+11 |
| 375    | 7.30E+11 | 7.34E+11 |
| 400    | 7.94E+11 | 7.98E+11 |

XeF<sub>6</sub> [<sup>18</sup>F<sub>β</sub>]

| T(K)   | CVT      | CVT+SCT  |
|--------|----------|----------|
| 4      | 1.75E-33 | 4.56E+02 |
| 5      | 1.19E-24 | 4.56E+02 |
| 6      | 9.55E-19 | 4.56E+02 |
| 7      | 1.61E-14 | 4.56E+02 |
| 8      | 2.43E-11 | 4.57E+02 |
| 9      | 7.29E-09 | 4.61E+02 |
| 10     | 7.08E-07 | 4.71E+02 |
| 12     | 6.93E-04 | 5.44E+02 |
| 14     | 9.72E-02 | 8.03E+02 |
| 16     | 4.02E+00 | 1.63E+03 |
| 18     | 7.38E+01 | 4.31E+03 |
| 20     | 7.62E+02 | 1.30E+04 |
| 22     | 5.19E+03 | 4.53E+04 |
| 24     | 2.58E+04 | 1.40E+05 |
| 26     | 1.00E+05 | 3.93E+05 |
| 28     | 3.23E+05 | 1.00E+06 |
| 30     | 8.90E+05 | 2.31E+06 |
| 40     | 3.15E+07 | 5.16E+07 |
| 50     | 2.72E+08 | 3.69E+08 |
| 75     | 4.99E+09 | 5.69E+09 |
| 77.36  | 5.97E+09 | 6.76E+09 |
| 100    | 2.21E+10 | 2.38E+10 |
| 125    | 5.51E+10 | 5.77E+10 |
| 150    | 1.02E+11 | 1.06E+11 |
| 175    | 1.61E+11 | 1.65E+11 |
| 194.7  | 2.12E+11 | 2.16E+11 |
| 200    | 2.26E+11 | 2.31E+11 |
| 225    | 2.96E+11 | 3.01E+11 |
| 250    | 3.68E+11 | 3.73E+11 |
| 273.15 | 4.35E+11 | 4.40E+11 |
| 275    | 4.41E+11 | 4.45E+11 |
| 298.15 | 5.07E+11 | 5.11E+11 |
| 300    | 5.12E+11 | 5.16E+11 |
| 325    | 5.82E+11 | 5.86E+11 |
| 350    | 6.50E+11 | 6.54E+11 |
| 373.15 | 7.11E+11 | 7.15E+11 |
| 375    | 7.16E+11 | 7.19E+11 |
| 400    | 7.79E+11 | 7.82E+11 |

XeF<sub>6</sub> [<sup>18</sup>F<sub>γ</sub>]

| T(K)   | CVT      | CVT+SCT  |
|--------|----------|----------|
| 4      | 2.62E-33 | 5.56E+02 |
| 5      | 1.64E-24 | 5.56E+02 |
| 6      | 1.25E-18 | 5.56E+02 |
| 7      | 2.02E-14 | 5.56E+02 |
| 8      | 2.96E-11 | 5.57E+02 |
| 9      | 8.71E-09 | 5.61E+02 |
| 10     | 8.31E-07 | 5.72E+02 |
| 12     | 7.92E-04 | 6.54E+02 |
| 14     | 1.09E-01 | 9.46E+02 |
| 16     | 4.45E+00 | 1.88E+03 |
| 18     | 8.06E+01 | 4.95E+03 |
| 20     | 8.26E+02 | 1.48E+04 |
| 22     | 5.58E+03 | 5.04E+04 |
| 24     | 2.76E+04 | 1.54E+05 |
| 26     | 1.07E+05 | 4.28E+05 |
| 28     | 3.42E+05 | 1.08E+06 |
| 30     | 9.40E+05 | 2.48E+06 |
| 40     | 3.29E+07 | 5.43E+07 |
| 50     | 2.82E+08 | 3.84E+08 |
| 75     | 5.12E+09 | 5.85E+09 |
| 77.36  | 6.13E+09 | 6.94E+09 |
| 100    | 2.26E+10 | 2.43E+10 |
| 125    | 5.60E+10 | 5.87E+10 |
| 150    | 1.04E+11 | 1.07E+11 |
| 175    | 1.63E+11 | 1.67E+11 |
| 194.7  | 2.14E+11 | 2.19E+11 |
| 200    | 2.29E+11 | 2.33E+11 |
| 225    | 2.99E+11 | 3.04E+11 |
| 250    | 3.72E+11 | 3.76E+11 |
| 273.15 | 4.39E+11 | 4.43E+11 |
| 275    | 4.44E+11 | 4.49E+11 |
| 298.15 | 5.11E+11 | 5.15E+11 |
| 300    | 5.16E+11 | 5.21E+11 |
| 325    | 5.87E+11 | 5.91E+11 |
| 350    | 6.55E+11 | 6.59E+11 |
| 373.15 | 7.16E+11 | 7.20E+11 |
| 375    | 7.21E+11 | 7.25E+11 |
| 400    | 7.84E+11 | 7.88E+11 |

XeF<sub>6</sub> [<sup>129</sup>Xe]

| T(K)   | CVT      | CVT+SCT  |
|--------|----------|----------|
| 4      | 1.85E-33 | 5.10E+02 |
| 5      | 1.24E-24 | 5.10E+02 |
| 6      | 9.89E-19 | 5.10E+02 |
| 7      | 1.66E-14 | 5.10E+02 |
| 8      | 2.49E-11 | 5.11E+02 |
| 9      | 7.46E-09 | 5.15E+02 |
| 10     | 7.23E-07 | 5.25E+02 |
| 12     | 7.06E-04 | 6.01E+02 |
| 14     | 9.86E-02 | 8.67E+02 |
| 16     | 4.08E+00 | 1.72E+03 |
| 18     | 7.46E+01 | 4.49E+03 |
| 20     | 7.70E+02 | 1.34E+04 |
| 22     | 5.24E+03 | 4.66E+04 |
| 24     | 2.60E+04 | 1.43E+05 |
| 26     | 1.01E+05 | 4.01E+05 |
| 28     | 3.25E+05 | 1.02E+06 |
| 30     | 8.96E+05 | 2.35E+06 |
| 40     | 3.17E+07 | 5.21E+07 |
| 50     | 2.73E+08 | 3.72E+08 |
| 75     | 5.01E+09 | 5.72E+09 |
| 77.36  | 5.99E+09 | 6.79E+09 |
| 100    | 2.22E+10 | 2.39E+10 |
| 125    | 5.52E+10 | 5.79E+10 |
| 150    | 1.03E+11 | 1.06E+11 |
| 175    | 1.61E+11 | 1.65E+11 |
| 194.7  | 2.12E+11 | 2.17E+11 |
| 200    | 2.27E+11 | 2.31E+11 |
| 225    | 2.97E+11 | 3.01E+11 |
| 250    | 3.69E+11 | 3.73E+11 |
| 273.15 | 4.36E+11 | 4.40E+11 |
| 275    | 4.41E+11 | 4.46E+11 |
| 298.15 | 5.08E+11 | 5.12E+11 |
| 300    | 5.13E+11 | 5.17E+11 |
| 325    | 5.83E+11 | 5.87E+11 |
| 350    | 6.51E+11 | 6.55E+11 |
| 373.15 | 7.12E+11 | 7.16E+11 |
| 375    | 7.17E+11 | 7.20E+11 |
| 400    | 7.80E+11 | 7.83E+11 |

XeF<sub>6</sub> [<sup>131</sup>Xe]

| T(K)   | CVT      | CVT+SCT  |
|--------|----------|----------|
| 4      | 1.82E-33 | 4.61E+02 |
| 5      | 1.23E-24 | 4.61E+02 |
| 6      | 9.79E-19 | 4.61E+02 |
| 7      | 1.64E-14 | 4.61E+02 |
| 8      | 2.47E-11 | 4.62E+02 |
| 9      | 7.41E-09 | 4.66E+02 |
| 10     | 7.18E-07 | 4.77E+02 |
| 12     | 7.02E-04 | 5.53E+02 |
| 14     | 9.82E-02 | 8.22E+02 |
| 16     | 4.06E+00 | 1.68E+03 |
| 18     | 7.44E+01 | 4.45E+03 |
| 20     | 7.68E+02 | 1.34E+04 |
| 22     | 5.22E+03 | 4.67E+04 |
| 24     | 2.59E+04 | 1.43E+05 |
| 26     | 1.01E+05 | 4.01E+05 |
| 28     | 3.24E+05 | 1.02E+06 |
| 30     | 8.94E+05 | 2.35E+06 |
| 40     | 3.16E+07 | 5.21E+07 |
| 50     | 2.73E+08 | 3.71E+08 |
| 75     | 5.00E+09 | 5.71E+09 |
| 77.36  | 5.99E+09 | 6.78E+09 |
| 100    | 2.22E+10 | 2.39E+10 |
| 125    | 5.52E+10 | 5.78E+10 |
| 150    | 1.03E+11 | 1.06E+11 |
| 175    | 1.61E+11 | 1.65E+11 |
| 194.7  | 2.12E+11 | 2.16E+11 |
| 200    | 2.27E+11 | 2.31E+11 |
| 225    | 2.97E+11 | 3.01E+11 |
| 250    | 3.69E+11 | 3.73E+11 |
| 273.15 | 4.36E+11 | 4.40E+11 |
| 275    | 4.41E+11 | 4.45E+11 |
| 298.15 | 5.07E+11 | 5.11E+11 |
| 300    | 5.12E+11 | 5.17E+11 |
| 325    | 5.82E+11 | 5.86E+11 |
| 350    | 6.50E+11 | 6.54E+11 |
| 373.15 | 7.11E+11 | 7.15E+11 |
| 375    | 7.16E+11 | 7.20E+11 |
| 400    | 7.79E+11 | 7.83E+11 |

XeF<sub>6</sub> [<sup>132</sup>Xe]

| T(K)   | CVT      | CVT+SCT  |
|--------|----------|----------|
| 4      | 1.80E-33 | 4.73E+02 |
| 5      | 1.22E-24 | 4.73E+02 |
| 6      | 9.74E-19 | 4.73E+02 |
| 7      | 1.64E-14 | 4.73E+02 |
| 8      | 2.46E-11 | 4.74E+02 |
| 9      | 7.39E-09 | 4.78E+02 |
| 10     | 7.16E-07 | 4.88E+02 |
| 12     | 7.00E-04 | 5.62E+02 |
| 14     | 9.80E-02 | 8.23E+02 |
| 16     | 4.05E+00 | 1.66E+03 |
| 18     | 7.42E+01 | 4.36E+03 |
| 20     | 7.67E+02 | 1.31E+04 |
| 22     | 5.21E+03 | 4.54E+04 |
| 24     | 2.59E+04 | 1.40E+05 |
| 26     | 1.01E+05 | 3.94E+05 |
| 28     | 3.24E+05 | 1.00E+06 |
| 30     | 8.93E+05 | 2.32E+06 |
| 40     | 3.16E+07 | 5.17E+07 |
| 50     | 2.73E+08 | 3.70E+08 |
| 75     | 5.00E+09 | 5.70E+09 |
| 77.36  | 5.98E+09 | 6.77E+09 |
| 100    | 2.21E+10 | 2.38E+10 |
| 125    | 5.52E+10 | 5.78E+10 |
| 150    | 1.03E+11 | 1.06E+11 |
| 175    | 1.61E+11 | 1.65E+11 |
| 194.7  | 2.12E+11 | 2.16E+11 |
| 200    | 2.26E+11 | 2.31E+11 |
| 225    | 2.96E+11 | 3.01E+11 |
| 250    | 3.68E+11 | 3.73E+11 |
| 273.15 | 4.35E+11 | 4.40E+11 |
| 275    | 4.41E+11 | 4.45E+11 |
| 298.15 | 5.07E+11 | 5.11E+11 |
| 300    | 5.12E+11 | 5.16E+11 |
| 325    | 5.82E+11 | 5.86E+11 |
| 350    | 6.50E+11 | 6.54E+11 |
| 373.15 | 7.11E+11 | 7.15E+11 |
| 375    | 7.16E+11 | 7.19E+11 |
| 400    | 7.79E+11 | 7.82E+11 |

XeF<sub>6</sub> [<sup>134</sup>Xe]

| T(K)   | CVT      | CVT+SCT  |
|--------|----------|----------|
| 4      | 1.78E-33 | 4.92E+02 |
| 5      | 1.21E-24 | 4.92E+02 |
| 6      | 9.64E-19 | 4.92E+02 |
| 7      | 1.62E-14 | 4.92E+02 |
| 8      | 2.44E-11 | 4.93E+02 |
| 9      | 7.34E-09 | 4.97E+02 |
| 10     | 7.12E-07 | 5.08E+02 |
| 12     | 6.96E-04 | 5.82E+02 |
| 14     | 9.75E-02 | 8.45E+02 |
| 16     | 4.04E+00 | 1.69E+03 |
| 18     | 7.40E+01 | 4.42E+03 |
| 20     | 7.64E+02 | 1.33E+04 |
| 22     | 5.20E+03 | 4.58E+04 |
| 24     | 2.58E+04 | 1.41E+05 |
| 26     | 1.01E+05 | 3.97E+05 |
| 28     | 3.23E+05 | 1.01E+06 |
| 30     | 8.91E+05 | 2.33E+06 |
| 40     | 3.15E+07 | 5.18E+07 |
| 50     | 2.72E+08 | 3.70E+08 |
| 75     | 4.99E+09 | 5.70E+09 |
| 77.36  | 5.98E+09 | 6.77E+09 |
| 100    | 2.21E+10 | 2.38E+10 |
| 125    | 5.51E+10 | 5.78E+10 |
| 150    | 1.02E+11 | 1.06E+11 |
| 175    | 1.61E+11 | 1.65E+11 |
| 194.7  | 2.12E+11 | 2.16E+11 |
| 200    | 2.26E+11 | 2.30E+11 |
| 225    | 2.96E+11 | 3.00E+11 |
| 250    | 3.68E+11 | 3.72E+11 |
| 273.15 | 4.35E+11 | 4.39E+11 |
| 275    | 4.40E+11 | 4.45E+11 |
| 298.15 | 5.07E+11 | 5.11E+11 |
| 300    | 5.12E+11 | 5.16E+11 |
| 325    | 5.82E+11 | 5.86E+11 |
| 350    | 6.50E+11 | 6.53E+11 |
| 373.15 | 7.10E+11 | 7.14E+11 |
| 375    | 7.15E+11 | 7.19E+11 |
| 400    | 7.78E+11 | 7.82E+11 |

XeF<sub>6</sub> [<sup>136</sup>Xe]

| T(K)   | CVT      | CVT+SCT  |
|--------|----------|----------|
| 4      | 1.75E-33 | 4.48E+02 |
| 5      | 1.19E-24 | 4.48E+02 |
| 6      | 9.54E-19 | 4.48E+02 |
| 7      | 1.61E-14 | 4.48E+02 |
| 8      | 2.42E-11 | 4.49E+02 |
| 9      | 7.29E-09 | 4.53E+02 |
| 10     | 7.07E-07 | 4.63E+02 |
| 12     | 6.93E-04 | 5.36E+02 |
| 14     | 9.71E-02 | 7.91E+02 |
| 16     | 4.02E+00 | 1.60E+03 |
| 18     | 7.37E+01 | 4.25E+03 |
| 20     | 7.62E+02 | 1.28E+04 |
| 22     | 5.18E+03 | 4.50E+04 |
| 24     | 2.57E+04 | 1.39E+05 |
| 26     | 1.00E+05 | 3.92E+05 |
| 28     | 3.22E+05 | 9.97E+05 |
| 30     | 8.89E+05 | 2.31E+06 |
| 40     | 3.15E+07 | 5.15E+07 |
| 50     | 2.72E+08 | 3.69E+08 |
| 75     | 4.99E+09 | 5.69E+09 |
| 77.36  | 5.97E+09 | 6.75E+09 |
| 100    | 2.21E+10 | 2.38E+10 |
| 125    | 5.51E+10 | 5.77E+10 |
| 150    | 1.02E+11 | 1.06E+11 |
| 175    | 1.61E+11 | 1.64E+11 |
| 194.7  | 2.12E+11 | 2.16E+11 |
| 200    | 2.26E+11 | 2.30E+11 |
| 225    | 2.96E+11 | 3.00E+11 |
| 250    | 3.68E+11 | 3.72E+11 |
| 273.15 | 4.35E+11 | 4.39E+11 |
| 275    | 4.40E+11 | 4.44E+11 |
| 298.15 | 5.06E+11 | 5.10E+11 |
| 300    | 5.11E+11 | 5.15E+11 |
| 325    | 5.81E+11 | 5.85E+11 |
| 350    | 6.49E+11 | 6.53E+11 |
| 373.15 | 7.10E+11 | 7.13E+11 |
| 375    | 7.15E+11 | 7.18E+11 |
| 400    | 7.77E+11 | 7.81E+11 |

IF<sub>6</sub><sup>-</sup>

| T(K)   | CVT      | CVT+SCT  |
|--------|----------|----------|
| 4      | 3.51E-24 | 2.68E+03 |
| 5      | 3.30E-17 | 2.68E+03 |
| 6      | 1.52E-12 | 2.68E+03 |
| 7      | 3.33E-09 | 2.68E+03 |
| 8      | 1.09E-06 | 2.70E+03 |
| 9      | 9.93E-05 | 2.76E+03 |
| 10     | 3.72E-03 | 2.91E+03 |
| 12     | 8.74E-01 | 3.97E+03 |
| 14     | 4.41E+01 | 8.20E+03 |
| 16     | 8.50E+02 | 2.55E+04 |
| 18     | 8.59E+03 | 8.69E+04 |
| 20     | 5.50E+04 | 3.05E+05 |
| 22     | 2.53E+05 | 9.56E+05 |
| 24     | 9.08E+05 | 2.64E+06 |
| 26     | 2.68E+06 | 6.46E+06 |
| 28     | 6.81E+06 | 1.43E+07 |
| 30     | 1.53E+07 | 2.87E+07 |
| 40     | 2.63E+08 | 3.69E+08 |
| 50     | 1.48E+09 | 1.82E+09 |
| 75     | 1.52E+10 | 1.67E+10 |
| 77.36  | 1.76E+10 | 1.92E+10 |
| 100    | 5.04E+10 | 5.31E+10 |
| 125    | 1.05E+11 | 1.08E+11 |
| 150    | 1.73E+11 | 1.76E+11 |
| 175    | 2.47E+11 | 2.51E+11 |
| 194.7  | 3.09E+11 | 3.13E+11 |
| 200    | 3.25E+11 | 3.29E+11 |
| 225    | 4.03E+11 | 4.07E+11 |
| 250    | 4.79E+11 | 4.83E+11 |
| 273.15 | 5.47E+11 | 5.51E+11 |
| 275    | 5.53E+11 | 5.56E+11 |
| 298.15 | 6.18E+11 | 6.21E+11 |
| 300    | 6.23E+11 | 6.26E+11 |
| 325    | 6.89E+11 | 6.93E+11 |
| 350    | 7.53E+11 | 7.56E+11 |
| 373.15 | 8.08E+11 | 8.11E+11 |
| 375    | 8.12E+11 | 8.15E+11 |
| 400    | 8.69E+11 | 8.71E+11 |

TeF<sub>6</sub><sup>2-</sup>

| T(K)   | CVT      | CVT+SCT  |
|--------|----------|----------|
| 4      | 1.96E+02 | 5.56E+08 |
| 5      | 1.31E+04 | 5.56E+08 |
| 6      | 2.22E+05 | 5.58E+08 |
| 7      | 1.72E+06 | 5.70E+08 |
| 8      | 8.11E+06 | 6.13E+08 |
| 9      | 2.75E+07 | 7.22E+08 |
| 10     | 7.39E+07 | 9.47E+08 |
| 12     | 3.33E+08 | 1.46E+09 |
| 14     | 9.95E+08 | 2.85E+09 |
| 16     | 2.29E+09 | 5.04E+09 |
| 18     | 4.43E+09 | 8.16E+09 |
| 20     | 7.55E+09 | 1.23E+10 |
| 22     | 1.17E+10 | 1.75E+10 |
| 24     | 1.70E+10 | 2.37E+10 |
| 26     | 2.33E+10 | 3.09E+10 |
| 28     | 3.06E+10 | 3.90E+10 |
| 30     | 3.89E+10 | 4.79E+10 |
| 40     | 9.08E+10 | 1.02E+11 |
| 50     | 1.53E+11 | 1.65E+11 |
| 75     | 3.16E+11 | 3.27E+11 |
| 77.36  | 3.31E+11 | 3.41E+11 |
| 100    | 4.62E+11 | 4.71E+11 |
| 125    | 5.85E+11 | 5.92E+11 |
| 150    | 6.87E+11 | 6.93E+11 |
| 175    | 7.73E+11 | 7.77E+11 |
| 194.7  | 8.30E+11 | 8.34E+11 |
| 200    | 8.45E+11 | 8.49E+11 |
| 225    | 9.06E+11 | 9.10E+11 |
| 250    | 9.59E+11 | 9.62E+11 |
| 273.15 | 1.00E+12 | 1.00E+12 |
| 275    | 1.01E+12 | 1.01E+12 |
| 298.15 | 1.04E+12 | 1.05E+12 |
| 300    | 1.05E+12 | 1.05E+12 |
| 325    | 1.08E+12 | 1.08E+12 |
| 350    | 1.11E+12 | 1.12E+12 |
| 373.15 | 1.14E+12 | 1.14E+12 |
| 375    | 1.14E+12 | 1.14E+12 |
| 400    | 1.17E+12 | 1.17E+12 |



**Table S3.** Kinetic isotope effect from CVT+SCT rate constants.

| T(K)   | F $\alpha+\beta+\gamma$ | F $\alpha$ | F $\beta$ | F $\gamma$ | $^{129}\text{Xe}/^{136}\text{Xe}$ | $^{129}\text{Xe}/^{134}\text{Xe}$ | $^{129}\text{Xe}/^{132}\text{Xe}$ | $^{129}\text{Xe}/^{131}\text{Xe}$ |
|--------|-------------------------|------------|-----------|------------|-----------------------------------|-----------------------------------|-----------------------------------|-----------------------------------|
| 4      | 2.07                    | 1.81       | 0.96      | 1.17       | 1.14                              | 1.04                              | 1.08                              | 1.11                              |
| 5      | 2.07                    | 1.81       | 0.96      | 1.17       | 1.14                              | 1.04                              | 1.08                              | 1.11                              |
| 6      | 2.07                    | 1.81       | 0.96      | 1.17       | 1.14                              | 1.04                              | 1.08                              | 1.11                              |
| 7      | 2.07                    | 1.81       | 0.96      | 1.17       | 1.14                              | 1.04                              | 1.08                              | 1.11                              |
| 8      | 2.07                    | 1.81       | 0.96      | 1.17       | 1.14                              | 1.04                              | 1.08                              | 1.11                              |
| 9      | 2.07                    | 1.81       | 0.96      | 1.17       | 1.14                              | 1.04                              | 1.08                              | 1.11                              |
| 10     | 2.07                    | 1.80       | 0.96      | 1.17       | 1.13                              | 1.03                              | 1.08                              | 1.10                              |
| 12     | 1.99                    | 1.75       | 0.97      | 1.16       | 1.12                              | 1.03                              | 1.07                              | 1.09                              |
| 14     | 1.88                    | 1.64       | 0.97      | 1.15       | 1.10                              | 1.03                              | 1.05                              | 1.05                              |
| 16     | 1.72                    | 1.51       | 0.98      | 1.13       | 1.08                              | 1.02                              | 1.04                              | 1.02                              |
| 18     | 1.59                    | 1.40       | 0.99      | 1.14       | 1.06                              | 1.02                              | 1.03                              | 1.01                              |
| 20     | 1.51                    | 1.37       | 0.99      | 1.13       | 1.05                              | 1.01                              | 1.02                              | 1.00                              |
| 22     | 1.36                    | 1.25       | 1.00      | 1.11       | 1.04                              | 1.02                              | 1.03                              | 1.00                              |
| 24     | 1.30                    | 1.21       | 1.00      | 1.10       | 1.03                              | 1.01                              | 1.02                              | 1.00                              |
| 26     | 1.26                    | 1.17       | 1.00      | 1.09       | 1.02                              | 1.01                              | 1.02                              | 1.00                              |
| 28     | 1.23                    | 1.15       | 1.00      | 1.08       | 1.02                              | 1.01                              | 1.02                              | 1.00                              |
| 30     | 1.20                    | 1.13       | 1.00      | 1.07       | 1.02                              | 1.01                              | 1.01                              | 1.00                              |
| 40     | 1.13                    | 1.09       | 1.00      | 1.05       | 1.01                              | 1.01                              | 1.01                              | 1.00                              |
| 50     | 1.10                    | 1.06       | 1.00      | 1.04       | 1.01                              | 1.01                              | 1.01                              | 1.00                              |
| 75     | 1.07                    | 1.04       | 1.00      | 1.03       | 1.01                              | 1.00                              | 1.00                              | 1.00                              |
| 77.36  | 1.07                    | 1.04       | 1.00      | 1.03       | 1.01                              | 1.00                              | 1.00                              | 1.00                              |
| 100    | 1.05                    | 1.03       | 1.00      | 1.02       | 1.00                              | 1.00                              | 1.00                              | 1.00                              |
| 125    | 1.04                    | 1.03       | 1.00      | 1.02       | 1.00                              | 1.00                              | 1.00                              | 1.00                              |
| 150    | 1.04                    | 1.03       | 1.00      | 1.01       | 1.00                              | 1.00                              | 1.00                              | 1.00                              |
| 175    | 1.04                    | 1.02       | 1.00      | 1.01       | 1.01                              | 1.00                              | 1.00                              | 1.00                              |
| 194.7  | 1.04                    | 1.02       | 1.00      | 1.01       | 1.00                              | 1.00                              | 1.00                              | 1.00                              |
| 200    | 1.03                    | 1.02       | 1.00      | 1.01       | 1.00                              | 1.00                              | 1.00                              | 1.00                              |
| 225    | 1.03                    | 1.02       | 1.00      | 1.01       | 1.00                              | 1.00                              | 1.00                              | 1.00                              |
| 250    | 1.03                    | 1.02       | 1.00      | 1.01       | 1.00                              | 1.00                              | 1.00                              | 1.00                              |
| 273.15 | 1.03                    | 1.02       | 1.00      | 1.01       | 1.00                              | 1.00                              | 1.00                              | 1.00                              |
| 275    | 1.03                    | 1.02       | 1.00      | 1.01       | 1.00                              | 1.00                              | 1.00                              | 1.00                              |
| 298.15 | 1.03                    | 1.02       | 1.00      | 1.01       | 1.00                              | 1.00                              | 1.00                              | 1.00                              |
| 300    | 1.03                    | 1.02       | 1.00      | 1.01       | 1.00                              | 1.00                              | 1.00                              | 1.00                              |
| 325    | 1.03                    | 1.02       | 1.00      | 1.01       | 1.00                              | 1.00                              | 1.00                              | 1.00                              |
| 350    | 1.03                    | 1.02       | 1.00      | 1.01       | 1.00                              | 1.00                              | 1.00                              | 1.00                              |
| 373.15 | 1.03                    | 1.02       | 1.00      | 1.01       | 1.00                              | 1.00                              | 1.00                              | 1.00                              |
| 375    | 1.03                    | 1.02       | 1.00      | 1.01       | 1.00                              | 1.00                              | 1.00                              | 1.00                              |
| 400    | 1.03                    | 1.02       | 1.00      | 1.01       | 1.00                              | 1.00                              | 1.00                              | 1.00                              |

**Example of Polyrate input file (.dat file):**

```

*GENERAL                                     *PATH                                     373.15
TITLE                                       SYMMETRY                                   375
  QMT_calculation_for_XeF6                 INTMU 3                                   400
END                                          SSTEP 0.001                              END
#DL ISPE                                   RPM pagem
ATOMS                                       SRANGE                                    ANALYSIS
1 Xe                                        SLP 20.                                  4
2 F                                         SLM -20.                                 5
3 F                                         END                                       6
4 F                                         SPECSTOP                                  7
5 F                                         CURVE VMEP                               8
6 F                                         PERCENTDOWN 99                          9
7 F                                         END                                       10
END                                          PRPATH                                    12
                                           coord 1 2                                14
                                           xmol                                     16
                                           freq 15                                 18
                                           END                                       20
NOSUPERMOL                                *TUNNEL                                  24
*SECOND                                     ZCT                                       26
HESSCAL hhook                              SCT                                       28
FPRINT                                       QRST                                    30
                                           harmonic                                40
*OPTIMIZATION                              mode 15                                  50
                                           states all                              75
PRINT                                       END                                       77.355
                                           100
OPTMIN ohook                               *RATE                                    125
OPTTS ohook                               FORWARDK                                  150
*REACT1                                     SIGMAF 1                                  175
INITGEO hooks                              TST                                       194.7
GEOM                                         CVT                                       200
1                                             PRDELG                                  225
2                                             PRPART rtp                              250
3                                             TEMP                                     273.15
4                                             4                                       275
5                                             5                                       298.15
6                                             6                                       300
7                                             7                                       300
END                                           8                                       325
                                           9                                       325
SPECIES nonlinrp                            10                                      350
                                           12                                      373.15
                                           14                                      375
*PROD1                                     16                                      400
INITGEO hooks                              18                                      END
GEOM                                         20                                      EACT
1                                             22                                      6. 10.
2                                             24                                      10. 20.
3                                             26                                      20. 50.
4                                             28                                      50. 100.
5                                             30                                      200. 225.
6                                             40                                      300. 325.
7                                             50                                      END
END                                           50                                      GTLOG
SPECIES nonlinrp                            75
                                           77.355
*START                                     100
INITGEO hooks                              125
GEOM                                         150
1                                             175
2                                             194.7
3                                             200
4                                             225
5                                             250
6                                             273.15
7                                             275
END                                           298.15
SPECIES nonlints                            300
PROJECT                                     325
                                           350

```

**XYZ optimized geometries at the BMK/def2tzvp level with superfine integral grid.**

**XeF<sub>6</sub>**

| Reactant/Product |           |           |           | Transition state |           |           |           |
|------------------|-----------|-----------|-----------|------------------|-----------|-----------|-----------|
| Xe               | 0.000000  | 0.000000  | 0.139158  | Xe               | 0.000000  | 0.000000  | 0.123763  |
| F                | 0.000000  | 1.847480  | 0.789863  | F                | -1.874920 | 0.000000  | -0.130337 |
| F                | 1.599965  | -0.923740 | 0.789863  | F                | 0.000000  | 1.738399  | 1.066699  |
| F                | -1.599965 | -0.923740 | 0.789863  | F                | -0.000000 | -1.738399 | 1.066699  |
| F                | 1.215111  | 0.701545  | -1.068180 | F                | 0.000000  | 1.176827  | -1.307650 |
| F                | -0.000000 | -1.403090 | -1.068180 | F                | 1.874920  | -0.000000 | -0.130337 |
| F                | -1.215111 | 0.701545  | -1.068180 | F                | -0.000000 | -1.176827 | -1.307650 |

**IF<sub>6</sub><sup>-</sup>**

| Reactant/Product |           |           |           | Transition state |           |           |           |
|------------------|-----------|-----------|-----------|------------------|-----------|-----------|-----------|
| I                | 0.000000  | 0.000000  | 0.138016  | I                | 0.000000  | 0.000000  | 0.123054  |
| F                | 0.000000  | 1.930389  | 0.823095  | F                | -1.931513 | 0.000000  | -0.153677 |
| F                | 1.671766  | -0.965194 | 0.823095  | F                | 0.000000  | 1.820924  | 1.123921  |
| F                | -1.671766 | -0.965194 | 0.823095  | F                | -0.000000 | -1.820924 | 1.123921  |
| F                | 1.243163  | 0.717741  | -1.094016 | F                | 0.000000  | 1.206505  | -1.332569 |
| F                | -0.000000 | -1.435481 | -1.094016 | F                | 1.931513  | -0.000000 | -0.153677 |
| F                | -1.243163 | 0.717741  | -1.094016 | F                | -0.000000 | -1.206505 | -1.332569 |

**TeF<sub>6</sub><sup>2-</sup>**

| Reactant/Product |           |           |           | Transition state |           |           |           |
|------------------|-----------|-----------|-----------|------------------|-----------|-----------|-----------|
| Te               | 0.000000  | 0.000000  | 0.110884  | Te               | 0.000000  | 0.000000  | 0.098639  |
| F                | 0.000000  | 2.038859  | 0.948281  | F                | -2.036903 | 0.000000  | -0.189951 |
| F                | 1.765703  | -1.019429 | 0.948281  | F                | 0.000000  | 1.904130  | 1.298736  |
| F                | -1.765703 | -1.019429 | 0.948281  | F                | -0.000000 | -1.904130 | 1.298736  |
| F                | 1.304524  | 0.753167  | -1.161835 | F                | 0.000000  | 1.277336  | -1.393742 |
| F                | -0.000000 | -1.506335 | -1.161835 | F                | 2.036903  | -0.000000 | -0.189951 |
| F                | -1.304524 | 0.753167  | -1.161835 | F                | -0.000000 | -1.277336 | -1.393742 |

Computed  $^{18}\text{F}$  monosubstituted IR spectra (blue for  $F_V$ , red for  $F_O$ ):

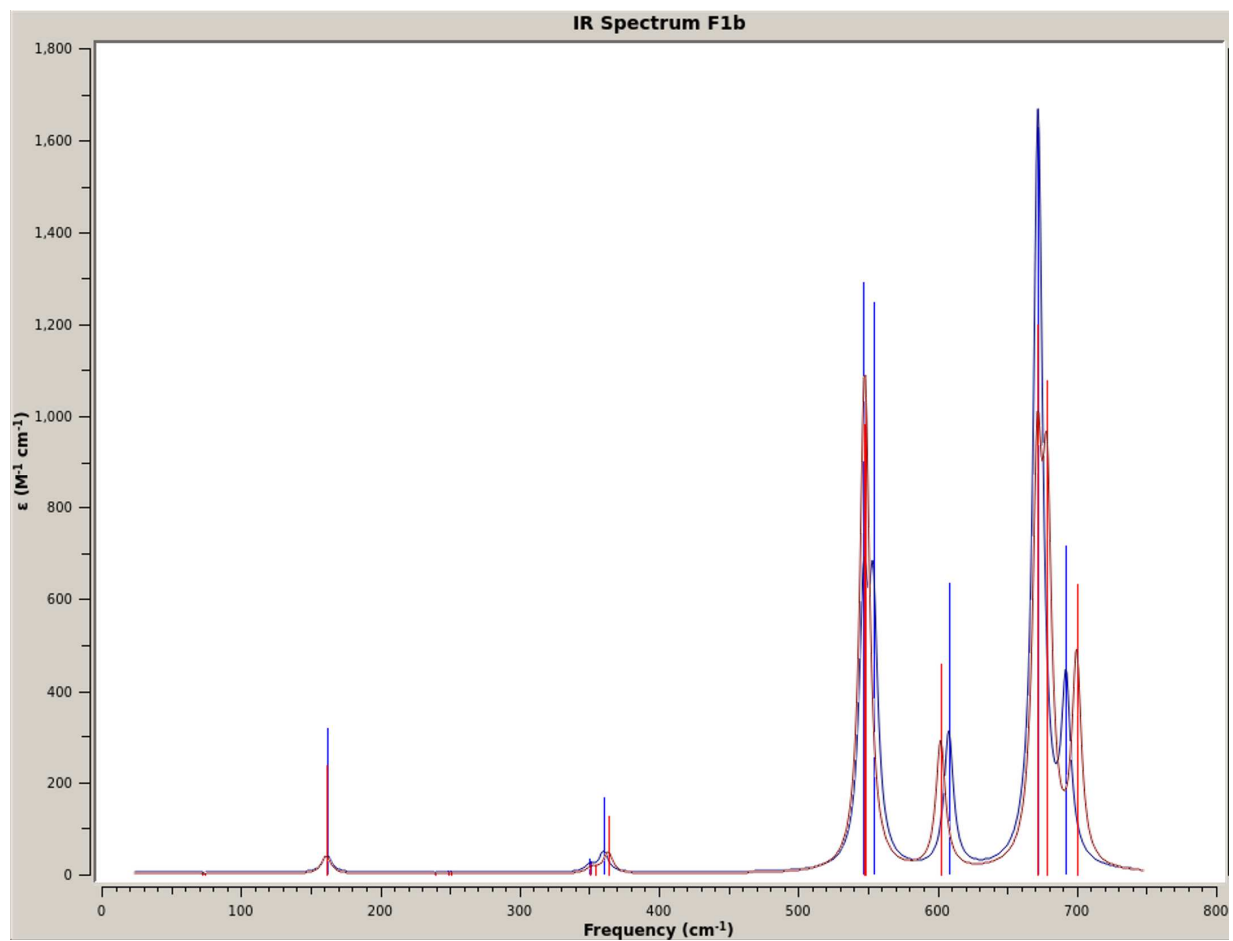

## References

- 1 K. A. Peterson, D. A. Dixon and H. Stoll, *J. Phys. Chem. A*, 2012, **116**, 9777–9782.
- 2 L. Cheng, J. Gauss and J. F. Stanton, *J. Chem. Phys.*, 2015, **142**, 224309.
- 3 Y.-Y. Chuang, J. C. Corchado and D. G. Truhlar, *J. Phys. Chem. A*, 1999, **103**, 1140–1149.
